# Supplementary material for: Genome sequencing, annotation and exploration of the SO2-tolerant non-conventional yeast Saccharomycodes ludwigii
Source: PubMed Central journal article supplement (PMC7903802; doi:10.1186/s12864-021-07438-z), 2021-02-23
Supplement: 12864_2021_7438_MOESM3_ESM.pdf [file 12864_2021_7438_MOESM3_ESM.pdf]

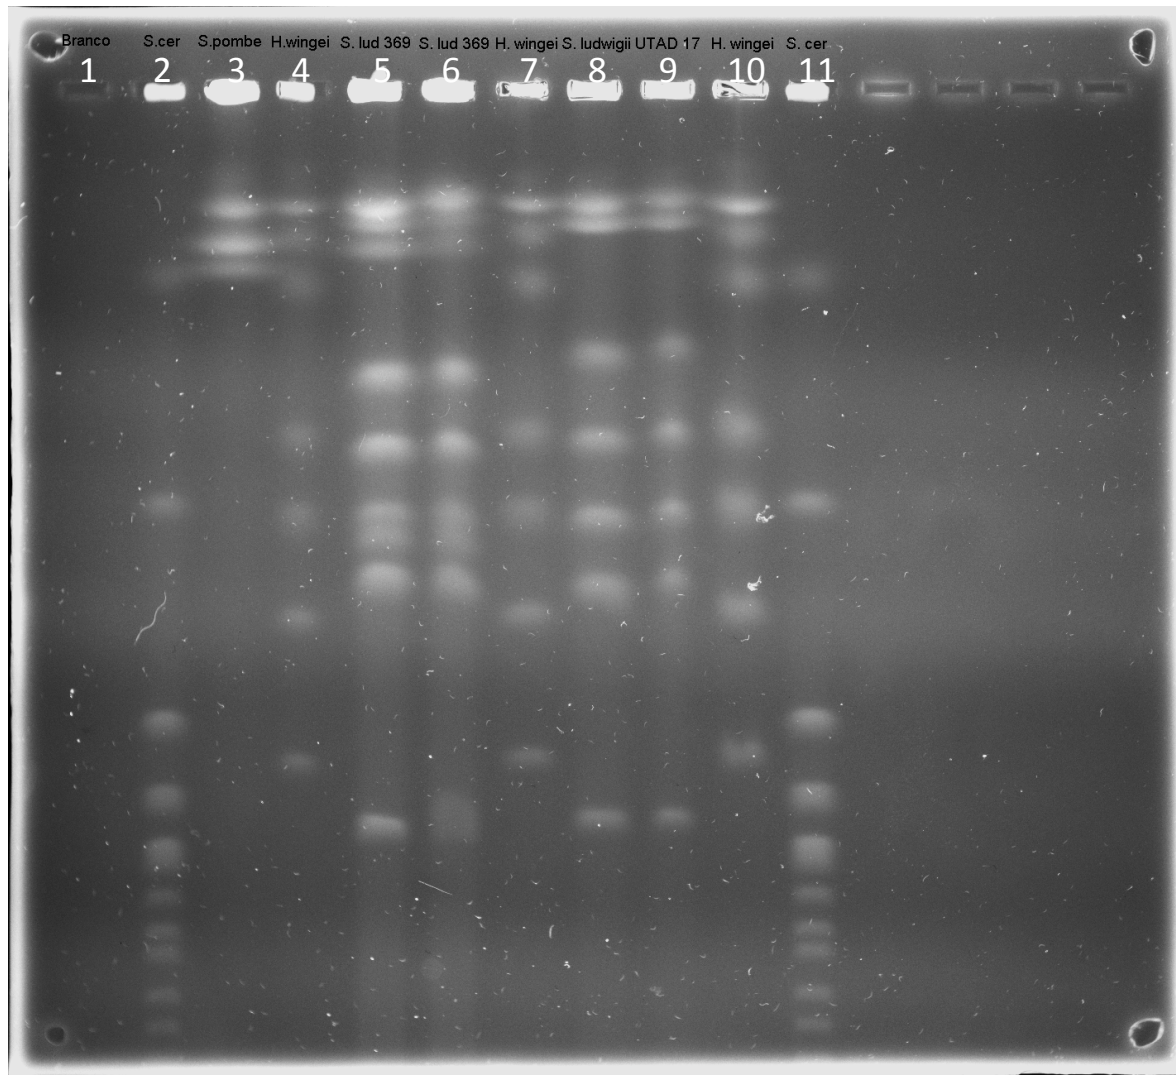

- 1- Blank
- 2 – *S. cerevisiae*
- 3 – Yeast A
- 4 – *Hansenula wingei*
- 5 – Yeast B
- 6 – Yeast C
- 7 – *Hansenula wingei*
- 8 – *S. ludwigii* UTAD17
- 9 – *S. ludwigii* UTAD17
- 10 – *Hansenula wingei*
- 11 – *S. cerevisiae*

Karyotyping, by PFGE, of the genomic DNA of a series of yeast species including *S. ludwigii* UTAD17 (the strain under analysis in this work), *H. wingei* and *S. cerevisiae* BY4741 (whose chromosomal bands were used as markers)
